# Supplementary material for: Plasmonic black metals via radiation absorption by two-dimensional arrays of ultra-sharp convex grooves
Source: PubMed Central journal article supplement (PMC4219155; doi:10.1038/srep06904), 2014-11-04
Supplement: srep06904-s1.pdf [file srep06904-s1.pdf]

## SUPPLEMENTARY INFORMATION

# Plasmonic black metals via radiation absorption by two-dimensional arrays of ultra-sharp convex grooves

Jonas Beermann<sup>1\*</sup>, René L. Eriksen<sup>1</sup>, Tobias Holmgaard<sup>2</sup>, Kjeld Pedersen<sup>2</sup> & Sergey I. Bozhevolnyi<sup>1</sup>

<sup>1</sup>Department of Technology and Innovation, University of Southern Denmark, Niels Bohrs Allé 1, DK-5230 Odense M, Denmark.

<sup>2</sup>Department of Physics and Nanotechnology, Aalborg University, Skjernvej 4A, DK-9220 Aalborg Øst, Denmark.

\*corresponding author: job@iti.sdu.dk

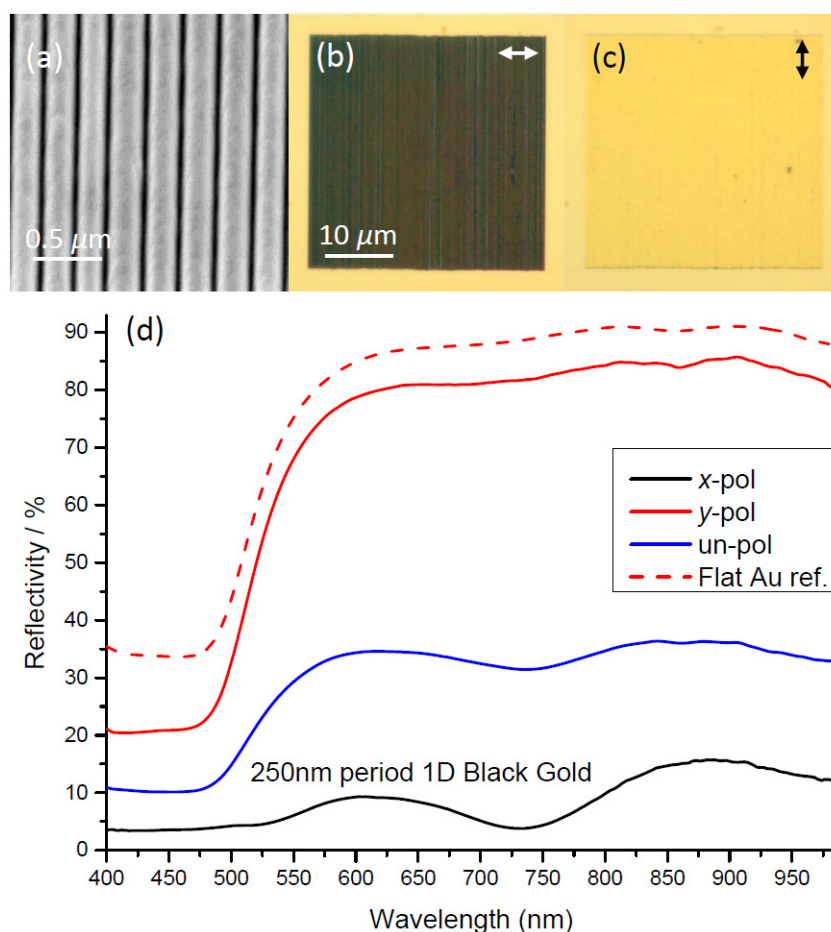

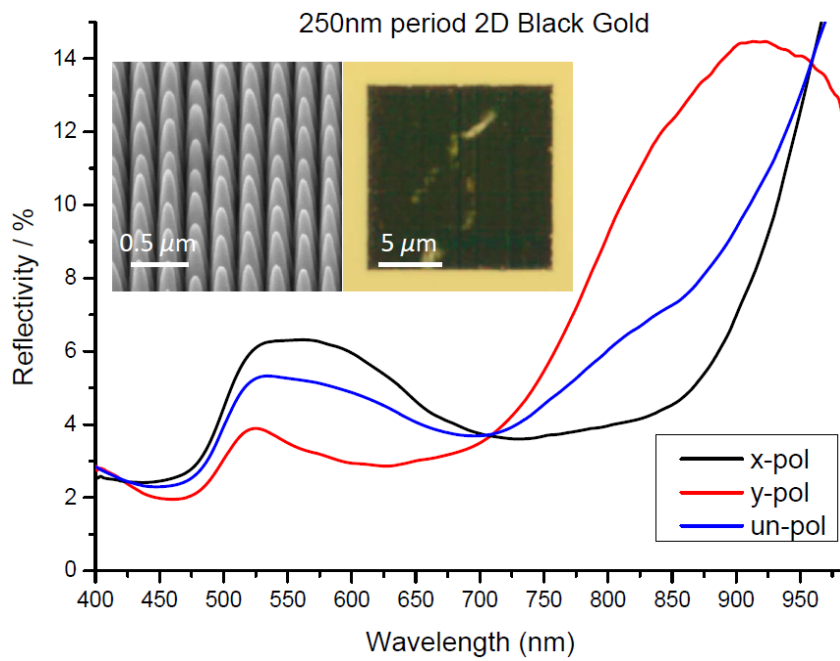

Figure S2. Reflectivity spectra of *2D black gold*, exhibiting some anisotropy due to material re-deposition by the previous FIB fabrication procedure<sup>11</sup>. Insert: SEM image taken at 54 deg. relative to normal incidence of the ion beam, along with un-polarized optical microscopy image of 2D black gold and smooth gold background, revealing minor post-fabrication damage to the structure.
